# Supplementary material for: Genetic Relationships of Ethnic Minorities in Southwest China Revealed by Microsatellite Markers
Source: PubMed Central journal article supplement (PMC2847899; doi:10.1371/journal.pone.0009895), 2010-03-29

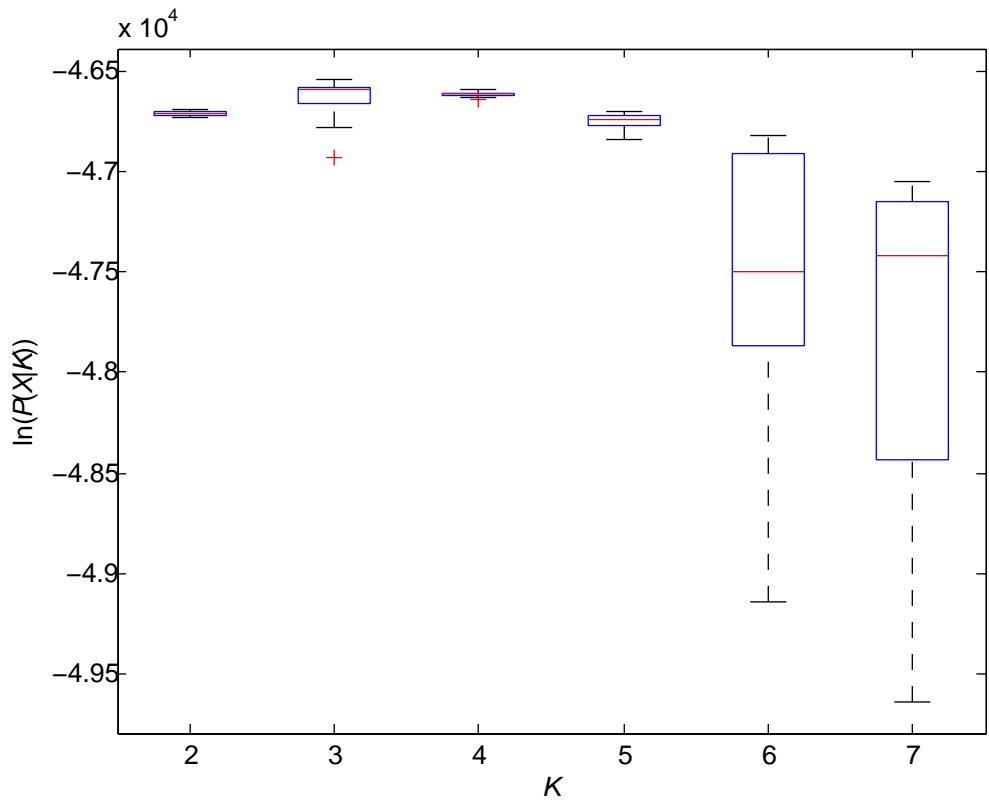

Supplement: pone.0009895.s003.pdf [file pone.0009895.s003.pdf]
